# Supplementary material
Source: PubMed Central journal article supplement (PMC3535018)
Supplement: NIHMS415902-supplement-ESI.pdf [file NIHMS415902-supplement-ESI.pdf]

# Antigen-Loaded pH-Sensitive Hydrogel Microparticles are Taken Up by Dendritic Cells with No Requirement for Targeting Antibodies

5 **Laura E. Ruff<sup>a,b</sup>, Enas A. Mahmoud<sup>c</sup>, Jagadis Sankaranarayanan<sup>c</sup>, José M. Morachis<sup>c</sup>, Carol D. Katayama<sup>a</sup>, Maripat Corr<sup>d</sup>, Stephen M. Hedrick<sup>a</sup>, and Adah Almutairi<sup>c\*</sup>**

<sup>a</sup>Division of Biological Sciences and the Department of Cellular and Molecular Medicine, University of California, San Diego, La Jolla CA 92093, United States

<sup>b</sup>Biomedical Sciences Graduate Program, University of California, San Diego, La Jolla CA 92093, United States

10 <sup>c</sup>Skaggs School of Pharmacy and Pharmaceutical Sciences, University of California, San Diego, La Jolla CA 92093, United States. E-mail: aalmutairi@ucsd.edu

<sup>d</sup>Department of Medicine, University of California, San Diego, La Jolla CA 92093, United States

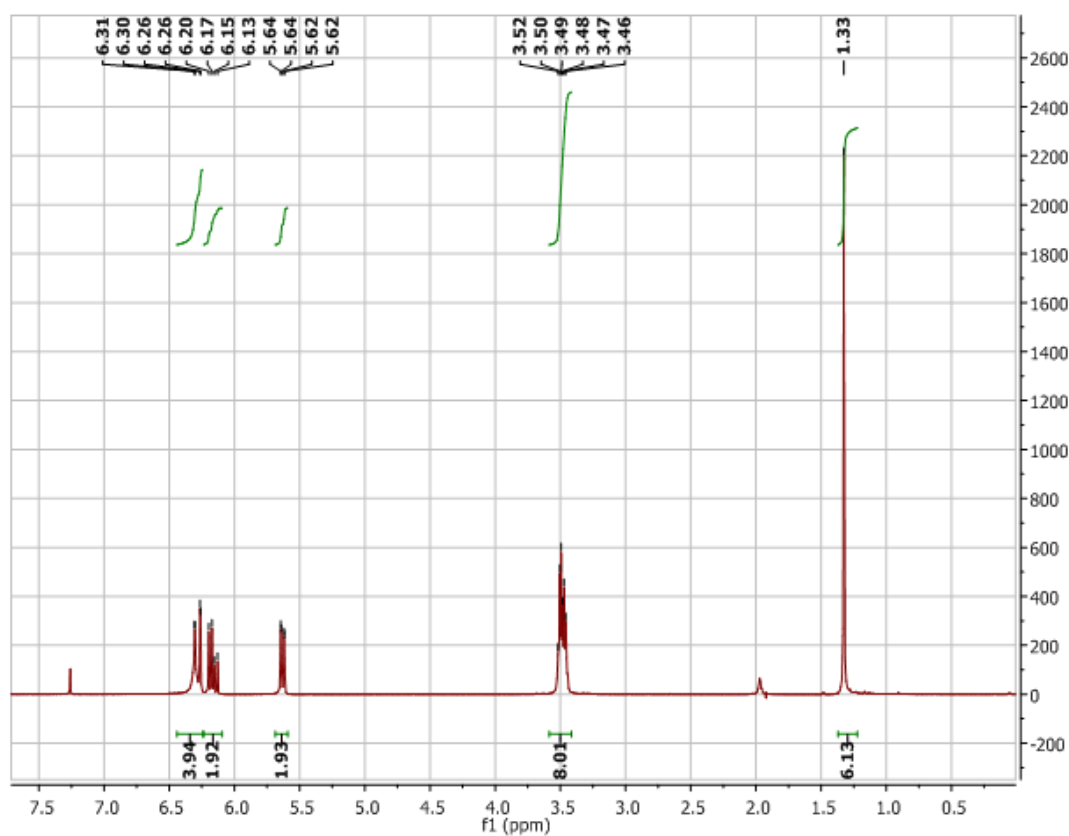

**Supplemental Figure 1. <sup>1</sup>H NMR of acid-sensitive crosslinker.** <sup>1</sup>H NMR (400 MHz, CDCl<sub>3</sub>) δ 6.28 (dd, J = 17.0, 1.6 Hz, 4H), 6.16 (dd, J = 17.0, 10.1 Hz, 2H), 5.63 (dd, J = 10.1, 1.6 Hz, 2H), 3.49 (dt, J = 14.4, 5.1 Hz, 8H), 1.33 (s, 6H).

15
